## **Social Determinants of Health and Cardiologist Involvement in the Care of Adults Hospitalized for Heart Failure**

David T. Zhang, MD;<sup>1</sup> Chukwuma Onyebeke, MD;<sup>1</sup> Musarrat Nahid, BS;<sup>2</sup> Lauren Balkan, MD;<sup>1</sup>  
Mahad Musse, MD;<sup>1</sup> Laura C. Pinheiro, PhD, MPH;<sup>2</sup> Madeline R. Sterling, MD, MPH, MS;<sup>2</sup>  
Raegan W. Durant, MD;<sup>3</sup> Todd M. Brown, MD, MSPH;<sup>4</sup> Emily B. Levitan, ScD;<sup>5</sup>  
Monika M. Safford, MD;<sup>1</sup> Parag Goyal, MD, MSc<sup>2,6</sup>

1. Department of Medicine, Weill Cornell Medicine, New York, NY.
2. Division of General Internal Medicine, Department of Medicine, Weill Cornell Medicine, New York, NY.
3. Division of Preventive Medicine, Department of Medicine, University of Alabama at Birmingham, Birmingham, AL.
4. Division of Cardiovascular Disease, Department of Medicine, University of Alabama at Birmingham, Birmingham, AL.
5. Department of Epidemiology, University of Alabama at Birmingham, Birmingham, AL.
6. Division of Cardiology, Department of Medicine, Weill Cornell Medicine, New York, NY.

### **Address for Correspondence:**

Parag Goyal, MD, MSc

Associate Professor of Medicine

Weill Cornell Medicine

1300 York Avenue, New York, NY 10021

Phone: 646-962-7571, Fax: 212-746-6665

E-mail: [pag9051@med.cornell.edu](mailto:pag9051@med.cornell.edu)

## Abstract

**Introduction:** The involvement of a cardiologist in the care of adults during a hospitalization for heart failure (HF) is associated with reduced rates of in-hospital mortality and hospital readmission. However, not all patients see a cardiologist when they are hospitalized for HF. Since reasons for this are not entirely clear, we sought to determine whether social determinants of health (SDOH) are associated with cardiologist involvement in the management of adults hospitalized for HF. We hypothesized that SDOH would be inversely associated with cardiologist involvement in the care of adults hospitalized for HF.

**Methods:** We included adult participants from the national REasons for Geographic And Racial Difference in Stroke (REGARDS) cohort, who experienced an adjudicated hospitalization for HF between 2009 and 2017. We excluded participants who were hospitalized at institutions that lacked cardiology services (n=246). We examined nine candidate SDOH, which align with the Healthy People 2030 conceptual model: Black race, social isolation (0–1 visits from a family or friend in the past month), social network/caregiver availability (having someone to care for them if ill), educational attainment < high school, annual household income < \$35,000, living in rural areas, living in a zip code with high poverty, living in a Health Professional Shortage Area, and residing in a state with poor public health infrastructure. The primary outcome was cardiologist involvement, a binary variable which was defined as involvement of a cardiologist as the primary responsible clinician or as a consultant, collected via chart review. We examined associations between each SDOH and cardiologist involvement using Poisson regression with robust standard errors. Candidate SDOH with statistically significant associations ( $p < 0.10$ ) were retained for multivariable analysis. Potential confounders/covariates for the multivariable analysis included age, race, sex, HF characteristics, comorbidities, and hospital characteristics.

**Results:** We examined 876 participants hospitalized at 549 unique US hospitals. The median age was 77.5 years (IQR 71.0-83.7), 45.9% were female, 41.4% were Black, and 56.2% had low income. Low household income (<\$35,000/year) was the only SDOH that had a statistically significant association with cardiologist involvement in a bivariate analysis (RR: 0.88 [95% CI: 0.82-0.95]). After adjusting for potential confounders, low income remained inversely associated (RR: 0.89 [95% CI: 0.82-0.97]).

**Conclusions:** Adults with low household income were 11% less likely to have a cardiologist involved in their care during a hospitalization for HF. This suggests that socioeconomic status may implicitly bias the care provided to patients hospitalized for HF.

## **Introduction:**

Heart failure (HF) is the one of the most common reasons for hospitalization among adults, with high rates of readmission, healthcare costs, and mortality.<sup>1-5</sup> The involvement of a cardiologist in the care of adults hospitalized for HF is associated with reduced rates of readmission and mortality.<sup>6-16</sup> Yet, cardiologist involvement is not universal when adults are hospitalized for HF. Some of this might relate to cardiologist availability, which is especially problematic in rural settings plagued by shortages in cardiologists.<sup>2, 7</sup>

However, another potential contributor may be implicit bias. Indeed, in two studies of adults hospitalized with HF, Black race was associated with decreased odds of cardiologist involvement in the intensive care unit (ICU) and on the floor.<sup>17, 18</sup> In another single-center study, both Black and Latinx adults hospitalized for HF were less likely to be admitted to a cardiology service and subsequently experienced worse outcomes.<sup>19</sup> Differential utilization of cardiologists in the management of HF is not unique to race.<sup>20-22</sup> In a multi-center study, Auerbach et al. (2000) found that adults admitted with severe HF who had an annual income less than \$11,000 were less likely to receive care from a cardiologist.<sup>17</sup> These observations raise concern that social determinants of health (SDOH), an increasingly recognized contributor to healthcare delivery,<sup>23, 24</sup> lead to suboptimal care in the management of adults hospitalized for HF.

Notably, prior studies on this topic have not examined multiple SDOH concurrently and have lacked geographic diversity. With the current study, we sought to investigate the association between nine different candidate SDOH and the involvement of cardiologists in the care of adults hospitalized for HF, using the REasons for Geographic And Racial Differences in Stroke (REGARDS) cohort, which represents a geographically diverse cohort, includes HF hospitalizations from >500 unique hospitals, and offers access to a broad range of SDOH.<sup>25-32</sup>

## **Methods:**

### *Study Population:*

The study population included adults from REGARDS with an adjudicated HF hospitalization in 2009-2017. In brief, the REGARDS cohort originally included 30,239 community-dwelling Black and White men and women aged  $\geq 45$  years recruited via mailing followed by telephone contact in 2003-2007 from all 48 contiguous states in the United States and the District of Columbia to investigate racial and geographic disparities in stroke mortality.<sup>33</sup> Black adults and residents of the Stroke Belt (Alabama, Arkansas, Georgia, Louisiana, Mississippi, North Carolina, South Carolina, and Tennessee), an area in the southeastern United States with high stroke mortality, were oversampled by design. Participants were recruited using commercially available lists. They underwent an initial 45-minute computer-assisted telephone interview about medical history, health behaviors, and risk factors followed by an in-home visit for baseline vitals, EKGs, medication reconciliation, bloodwork, and urine samples. At six-month intervals, participants were contacted by phone and asked about their health status and study outcomes such as hospitalizations. When participants report a hospitalization for a possible cardiovascular cause, their medical records were retrieved and underwent review and adjudication. HF adjudication was conducted by two expert clinicians based on chart-level data on symptoms, physical exams, laboratory values, imaging, and medical treatments. In the cases of a disagreement, a committee discussed to reach a consensus on a final decision.

For this study, we excluded participants hospitalized at institutions that lack cardiology services based on linked American Hospital Association data.<sup>34</sup> Of note, there were some hospitals included in the American Hospital Association dataset that lacked information on the

availability of cardiology services. To mitigate risk of bias related to excluded patients hospitalized at these hospitals, we imputed values for the availability of cardiology services using a random forest method that incorporated most other American Hospital Association data (including, but not limited to, location, bed size, teaching status, geriatrics service, palliative care service, licensed pharmacists). To do this, we used the R package “missForest.”<sup>35, 36</sup> We examined each participant’s first adjudicated hospitalization during the study period.

The study protocol was reviewed and approved by Weill Cornell Medicine’s and the University of Alabama at Birmingham’s Institutional Review Boards. All participants provided written informed consent.

#### *Exposure: SDOH*

The candidate exposures were nine SDOH available in REGARDS,<sup>25-32</sup> following the Healthy People 2030 conceptual framework.<sup>37</sup> This framework includes five domains: economic stability, education access and quality, social and community context, healthcare access and quality, and neighborhood and built environment.<sup>37</sup> Figure 1 outlines the SDOH from REGARDS mapped onto the Healthy People 2030 conceptual framework.

Similar to prior work,<sup>25-32</sup> we examined 1) Black race 2) social isolation (defined as having 0–1 visits from a family or friend in the past month), 3) social network/caregiver availability (defined as whether the participant reported having someone to care for them if ill), 4) low educational attainment (< high school education), 5) low annual household income (<\$35,000/year), 6) living in rural areas (defined as living in an isolated or small rural area based off of Rural Urban Commuting Area Codes), 7) living in a zip code with high poverty (>25% of residence below the federal poverty line), 8) living in a Health Professional Shortage Area

(HPSA), and 9) living in a state with poor public health infrastructure (assessed using data from the America's Health Ranking,<sup>38</sup> which ranked states based on their contribution to lifestyle, access to care, and disability; states where REGARDS participants lived that fell into the bottom 20th percentile for their ranking for  $\geq 8$  of the 10 years spanning 2000-2010, concordant with REGARDS recruitment between 2003-2007, were considered to have poor public health infrastructure).

*Outcome:*

The primary outcome was cardiologist involvement, which was defined as involvement of a cardiologist as the primary responsible clinician or as a consultant. This variable was collected through a rigorous chart review and abstraction process previously described.<sup>39</sup> Chart review and abstraction involved review of admission notes, progress notes, consultation notes, discharge summaries, medication reconciliations, laboratory values, and imaging studies to collect relevant data related to the HF hospitalization including cardiologist involvement.

*Covariates:*

Covariates were selected based on the Andersen Behavioral Model, which outlines predisposing, enabling, and need factors that contribute to healthcare utilization.<sup>40</sup> Since the primary exposures (SDOH) are considered enabling factors, covariates included predisposing factors and need factors. Predisposing factors included age (at time of admission) and baseline self-reported race, sex, and an indicator for Stroke Belt residence. Need factors included the following three sub-categories: HF characteristics, comorbid conditions, and hospital characteristics—HF characteristics and comorbid conditions were collected based on chart

abstraction, and hospital characteristics were based on American Hospital Association survey data which has been linked to the REGARDS cohort. HF characteristics included New York Heart Association Class (NYHA, Class I-IV), HF subtype (heart failure with preserved ejection fraction (HFpEF) if  $EF \geq 50\%$  or qualitative description of normal systolic function),<sup>41</sup> Get With The Guidelines-Heart Failure (GWTG-HF) Risk Score on admission (a score that predicts in-hospital all-cause mortality with a range of 0 to  $\geq 79$ ),<sup>42</sup> length of stay, intensive care unit (ICU) stay, and in-hospital cardiac arrest. Comorbid conditions included coronary artery disease, history of arrhythmia, diabetes mellitus, history of stroke, and the number of non-cardiac comorbid conditions ( $>40$ ) spanning multiple organ systems. Hospital characteristics included each hospital's total number of beds, presence/absence of cardiac ICU, and academic teaching status.

#### *Statistical Analysis:*

We calculated the frequency and distribution of each SDOH and examined collinearity using phi coefficients (Supplemental Table 1). We then examined associations between each SDOH and cardiologist involvement, using relative risks (RR). Similar to prior REGARDS studies, candidate SDOH with statistically significant associations ( $p < 0.10$ ) were retained for further multivariable analysis.<sup>25-32</sup> All SDOH were collected at the time of initial REGARDS baseline surveys.

To describe patient demographics, clinical, and hospital characteristics, descriptive statistics such as frequencies, percentages, medians, and inter-quartile ranges (IQR) were calculated. Chi-squared tests and Mann-Whitney tests were conducted for categorical and



continuous variables, respectively, to identify significant differences ( $p < 0.05$ ) across categories of the retained SDOH.

We then examined the association between retained SDOH and cardiologist involvement by conducting a modified Poisson regression with robust standard error, adjusting for the previously described covariates. We chose a modified Poisson regression to estimate RR given the high prevalence of cardiologist involvement.<sup>43</sup>

We used two-sided hypothesis testing with  $p < 0.05$  for all analyses performed. Multiple imputation by chained equations was used to impute missing SDOH and covariates to minimize bias under the assumption that data were missing at random. All analyses were performed in Stata 17 (StataCorp, College Station, TX).

## **Results:**

We examined 876 participants hospitalized at 549 unique US hospitals, of whom 75.3% received cardiology services while hospitalized. Figure S1 shows the exclusion cascade.

The prevalence of cardiologist involvement for each of the nine candidate SDOH are shown in Figure 2, and the associations between each of the SDOH and cardiologist involvement are shown in Table 1. Low income was the only candidate SDOH with a statistically significant association with cardiologist involvement: age-adjusted RR 0.88 (95% CI: 0.82-0.95,  $p < 0.001$ ) (Figure 3).

Characteristics of the full cohort and participants stratified by income are shown in Table 2. The median age of the cohort was 77.5 years (IQR 71.0-83.7), 45.9% were female, 41.4% were Black, and 56.2% had low income. Participants with low income were more likely to be Black, female, from the Stroke Belt, and to have diabetes. Those with low income were more

likely to have HFpEF, less likely to have a history of arrhythmia, and had a lower GWTG-HF Risk Score on admission. Of note, 94.9% of the study cohort had insurance; and the prevalence was comparable among those who had and did not have involvement of a cardiologist in their care. The highest rates of missing data were HF subtype (24.2%), NYHA class (23.6%), presence of cardiac ICU (6.6%), and hospital teaching status (5.7%). All other covariates were missing <3%.

In a fully-adjusted model, low income remained inversely associated with cardiologist involvement during hospitalization (adjusted RR=0.89, 95% CI: 0.82-0.97,  $p<0.001$ ) (Figure 3).

## **Discussion:**

In this cohort study of adults hospitalized for HF, we found that low annual income (<\$35,000/year) was associated with lower likelihood of cardiologist involvement during hospitalization. Prior work has shown the potential influence of SDOH on cardiologist involvement among adults with HF, but studies have been limited regarding the number and breadth of SDOH included. For example, Breathett et al. (2018) previously reported that Black race was inversely associated with receiving care from a cardiologist among adults admitted to the ICU with HF.<sup>18</sup> This study included race, but did not include socioeconomic status (SES). Auerbach et al. (2000) showed that low income was inversely associated with having a cardiologist as the primary responsible clinician (primary attending);<sup>17</sup> but their study only included those with advanced heart failure with reduced ejection fraction (HFrEF) and did not adjust for other potential SDOH like social isolation, social network, or area of residence. Our study included nine different SDOH (including race and income) that span multiple domains, and examined adults from >500 hospitals across the United States across the entire spectrum of left

ventricular ejection fraction and severity. Accordingly, our study now provides the most comprehensive examination of SDOH and cardiologist involvement to date.

Our observations remained even after controlling for length of stay, severity of disease, HF subtype, and hospital characteristics. This raises concern that our observation could relate to implicit bias. Implicit bias is the subconscious stereotype or attitude that consequentially affects behavior and actions, which can contribute to healthcare disparities.<sup>44, 45</sup> The concept of SDOH contributing to implicit bias with a subsequent effect on care provision is not new.<sup>16, 46, 47</sup> However, this is one of the first studies to suggest that low income can contribute to implicit bias.<sup>47</sup> Since income status may not be readily apparent to clinicians, further investigation is needed to better understand whether specific patient attributes or behaviors contribute to the suspected implicit bias observed among adults with low income. This phenomenon could relate to clinician perceptions about treatment adherence and/or affordability of services for adults with low income but will require further investigation. The vast majority of participants in this cohort had insurance; and we were unable to differentiate patients with different types of insurance. Future work should examine whether insurance type is a contributor to the findings here. It is also not known whether lower rates of cardiologist involvement mediate the well-described associations between low socioeconomic status and hospital readmission or mortality among adults with HF.<sup>48-51</sup> These findings should prompt further investigation into this possibility.

Our findings raise some questions related to a recent call for elicitation and documentation of SDOH experienced by adults with chronic diseases including HF.<sup>44</sup> Given the ubiquitous role of the electronic medical record (EMR) in patient care, some have advocated for incorporating SDOH fields into the EMR, as a strategy to improve the care of vulnerable populations.<sup>44, 52</sup> On the one hand, identifying adults with SDOH, such as low income, is

important to identify a subpopulation at particularly high risk for poor outcomes. On the other hand, identification of SDOH could lead to implicit bias that negatively impacts care provision. Consequently, it is critical that efforts intended to increase elicitation and documentation of SDOH be paired with strategies to address implicit bias from the healthcare system. Some previously described strategies to address implicit bias among clinicians in the healthcare system include implicit bias training, increasing diversity among healthcare workers, and partnering with community advocates.<sup>44, 45, 53-57</sup> Clearly, effort is needed to routinely incorporate these strategies as a means to address the multi-tiered effects of SDOH.

Our study has several strengths. First, we examined a geographically diverse cohort that included data on multiple (nine) SDOH that map onto an existing Healthy People 2030 framework.<sup>37</sup> In addition, we had chart-level data at the time of the HF hospitalization, which included multiple factors that could have impacted cardiologist involvement—this allowed us to adjust for several important confounders including HF severity. There are also some important limitations to note. First, the study sample included White and Black participants, but did not include other minoritized populations. Future studies are needed to understand the impact of SDOH on these groups. Second, although we examined nine different SDOH, we did not conduct a detailed examination of other relevant factors like health literacy, medication adherence, health insurance, or frailty. Finally, although we had chart-level data, involvement of a cardiologist may not have been clear in all scenarios, which could have led to misclassification bias.

**Conclusion:**

We found that low income was inversely associated with cardiologist involvement during hospitalization after adjusting for potential confounders. This suggests that certain social factors may implicitly bias the care provided to patients hospitalized for HF, calling attention to a potentially important source of disparity in care.

## **Acknowledgments**

The authors thank the other investigators, the staff, and the participants of the REGARDS study (REasons for Geographic And Racial Differences in Stroke) for their valuable contributions. A full list of participating REGARDS investigators and institutions can be found at <http://www.regardsstudy.org>.

## **Sources of Funding**

This research project is supported by cooperative agreement U01 NS041588 co-funded by the National Institute of Neurological Disorders and Stroke (NINDS) and the National Institute on Aging (NIA), National Institutes of Health, Department of Health and Human Services. The content is solely the responsibility of the authors and does not necessarily represent the official views of the NINDS or the NIA. Representatives of the NINDS were involved in the review of the manuscript but were not directly involved in the collection, management, analysis, or interpretation of the data. Additional funding was provided by National Heart, Lung, and Blood Institute (NHLBI) grant R01HL080477 (Dr. Safford) and NIA grant R03AG056446 (Dr. Goyal). Dr. Sterling is supported by the NHLBI (K23HL150160). The views expressed here do not reflect those of the NHLBI.

## **Disclosures**

Dr. Goyal is supported by American Heart Association grant 20CDA35310455, National Institute on Aging grant K76AG064428, and Loan Repayment Program award L30AG060521; Dr. Goyal receives personal fees for medicolegal consulting related to heart failure; receives

consulting fees from Sensorum Health; and has received honoraria from Akcea Therapeutics, Inc.

## References

1. Dharmarajan K and Rich M. Epidemiology, Pathophysiology, and Prognosis of Heart Failure in Older Adults. *Heart Fail Clin.* 2017;13.
2. Foody J, Rathore S, Wang Y, Herrin J, Masoudi F, Havranek E and Krumholz H. Physician specialty and mortality among elderly patients hospitalized with heart failure. *Am J Med.* 2005;118.
3. Parmar K, Xiu P, Chowdhury M, Patel E and Cohen M. In-hospital treatment and outcomes of heart failure in specialist and non-specialist services: a retrospective cohort study in the elderly. *Open Heart.* 2015;2.
4. Cheng R, Cox M, Neely M, Heidenreich P, Bhatt D, Eapen Z, Hernandez A, Butler J, Yancy C and Fonarow G. Outcomes in patients with heart failure with preserved, borderline, and reduced ejection fraction in the Medicare population. *Am Heart J.* 2014;168.
5. Shah K, Xu H, Matsouaka R, Bhatt D, Heidenreich P, Hernandez A, Devore A, Yancy C and Fonarow G. Heart Failure With Preserved, Borderline, and Reduced Ejection Fraction: 5-Year Outcomes. *J Am Coll Cardiol.* 2017;70.
6. Ahmed A, Allman R, Kiefe C, Person S, Shaneyfelt T, Sims R, Howard G and DeLong J. Association of consultation between generalists and cardiologists with quality and outcomes of heart failure care. *Am Heart J.* 2003;145.
7. Ezekowitz J, van Walraven C, McAlister F, Armstrong P and Kaul P. Impact of specialist follow-up in outpatients with congestive heart failure. *CMAJ.* 2005;172.
8. Indridason O, Coffman C and Oddone E. Is specialty care associated with improved survival of patients with congestive heart failure? *Am Heart J.* 2003;145.



9. Jong P, Gong Y, Liu P, Austin P, Lee D and Tu J. Care and outcomes of patients newly hospitalized for heart failure in the community treated by cardiologists compared with other specialists. *Circulation*. 2003;108.
10. Philbin E, Weil H, Erb T and Jenkins P. Cardiology or primary care for heart failure in the community setting: process of care and clinical outcomes. *Chest*. 1999;116.
11. Salata B, Sterling M, Beecy A, Ullal A, Jones E, Horn E and Goyal P. Discharge Processes and 30-Day Readmission Rates of Patients Hospitalized for Heart Failure on General Medicine and Cardiology Services. *Am J Cardiol*. 2018;121.
12. Selim A, Mazurek J, Iqbal M, Wang D, Negassa A and Zolty R. Mortality and readmission rates in patients hospitalized for acute decompensated heart failure: a comparison between cardiology and general-medicine service outcomes in an underserved population. *Clin Cardiol*. 2015;38.
13. Uthamalingam S, Kandala J, Selvaraj V, Martin W, Daley M, Patvardhan E, Capodilupo R, Moore S and Januzzi J. Outcomes of patients with acute decompensated heart failure managed by cardiologists versus noncardiologists. *Am J Cardiol*. 2015;115.
14. Bellotti P, Badano L, Acquarone N, Griffo R, Lo Pinto G, Maggioni A, Mattiauda C, Menardo G and Mombelloni P. Specialty-related differences in the epidemiology, clinical profile, management and outcome of patients hospitalized for heart failure; the OSCUR study. Outcome dello Scompenso Cardiaco in relazione all'Utilizzo delle Risorse. *Eur Heart J*. 2001;22.
15. Reis S, Holubkov R, Edmundowicz D, McNamara D, Zell K, Detre K and Feldman A. Treatment of patients admitted to the hospital with congestive heart failure: specialty-related disparities in practice patterns and outcomes. *J Am Coll Cardiol*. 1997;30.

16. Tabit C, Coplan M, Spencer K, Alcain C, Spiegel T, Vohra A, Adelman D, Liao J and Sanghani R. Cardiology Consultation in the Emergency Department Reduces Re-hospitalizations for Low-Socioeconomic Patients with Acute Decompensated Heart Failure. *Am J Med.* 2017;130.
17. Auerbach A, Hamel M, Califf R, Davis R, Wenger N, Desbiens N, Goldman L, Vidaillet H, Connors A, Lynn J, Dawson N and Phillips R. Patient characteristics associated with care by a cardiologist among adults hospitalized with severe congestive heart failure. SUPPORT Investigators. Study to Understand Prognoses and Preferences for Outcomes and Risks of Treatments. *J Am Coll Cardiol.* 2000;36.
18. Breathett K, Liu W, Allen L, Daugherty S, Blair I, Jones J, Grunwald G, Moss M, Kiser T, Burnham E, Vandivier R, Clark B, Lewis E, Mazimba S, Battaglia C, Ho P and Peterson P. African Americans Are Less Likely to Receive Care by a Cardiologist During an Intensive Care Unit Admission for Heart Failure. *JACC: Heart Failure.* 2018;6.
19. Eberly L, Richterman A, Beckett A, Wispelwey B, Marsh R, Cleveland Manchanda E, Chang C, Glynn R, Brooks K, Boxer R, Kakoza R, Goldsmith J, Loscalzo J, Morse M and Lewis E. Identification of Racial Inequities in Access to Specialized Inpatient Heart Failure Care at an Academic Medical Center. *Circulation: Heart Failure.* 2019;12.
20. Damiani G, Salvatori E, Silvestrini G, Ivanova I, Bojovic L, Iodice L and Ricciardi W. Influence of socioeconomic factors on hospital readmissions for heart failure and acute myocardial infarction in patients 65 years and older: evidence from a systematic review. *Clin Interv Aging.* 2015;10.

21. Lee W, Serag H, Ohsfeldt R, Eschbach K, Khalife W, Morsy M, Smith K and Raimer B. Racial Disparities in Type of Heart Failure and Hospitalization. *J Immigr Minor Health*. 2019;21.
22. Su A, Al'Aref S, Beecy A, Min J and Karas M. Clinical and Socioeconomic Predictors of Heart Failure Readmissions: A Review of Contemporary Literature. *Mayo Clin Proc*. 2019;94.
23. Havranek E, Mujahid M, Barr D, Blair I, Cohen M, Cruz-Flores S, Davey-Smith G, Dennison-Himmelfarb C, Lauer M, Lockwood D, Rosal M and Yancy C. Social Determinants of Risk and Outcomes for Cardiovascular Disease: A Scientific Statement From the American Heart Association. *Circulation*. 2015;132.
24. Alderwick H and Gottlieb L. Meanings and Misunderstandings: A Social Determinants of Health Lexicon for Health Care Systems. *The Millbank Quarterly*. 2019.
25. Sterling M, Ringel J, Pinheiro L, Safford M, Levitan E, Phillips E, Brown T and Goyal P. Social Determinants of Health and 90-Day Mortality After Hospitalization for Heart Failure in the REGARDS Study. *J Am Heart Assoc*. 2020;9.
26. Sterling M, Ringel J, Pinheiro L, Safford M, Levitan E, Phillips E, Brown T, Nguyen O and Goyal P. Social Determinants of Health and 30-Day Readmissions Among Adults Hospitalized for Heart Failure in the REGARDS Study. *Circulation: Heart Failure*. 2022;15.
27. Pinheiro L, Reshetnyak E, Sterling M, Levitan E, Safford M and Goyal P. Multiple Vulnerabilities to Health Disparities and Incident Heart Failure Hospitalization in the REGARDS Study. *Circ Cardiovasc Qual Outcomes*. 2020;13.
28. Safford M, Reshetnyak E, Sterling M, Richman J, Muntner P, Durant R, Booth J and Pinheiro L. Number of Social Determinants of Health and Fatal and Nonfatal Incident Coronary Heart Disease in the REGARDS Study. *Circulation*. 2021;143.

29. King J, Pinheiro L, Bryan R, J, Bress A, Shimbo D, Muntner P, Reynolds K, Cushman M, Howard G, Manly J and Safford M. Multiple Social Vulnerabilities to Health Disparities and Hypertension and Death in the REGARDS Study. *Hypertension*. 2022;79.
30. Reshetnyak E, Ntamatungiro M, Pinheiro L, Howard V, Carson A, Martin K and Safford M. Impact of Multiple Social Determinants of Health on Incident Stroke. *Stroke*. 2020;51.
31. Schroff P, Gamboa C, Durant R, Oikeh A, Richman J and Safford M. Vulnerabilities to Health Disparities and Statin Use in the REGARDS (Reasons for Geographic and Racial Differences in Stroke) Study. *Journal of the American Heart Association*. 2017;6.
32. Colantonio L, Richman J, Carson A, Lloyd-Jones D, Howard G, Deng L, Howard V, Safford M, Muntner P and Goff D. Performance of the Atherosclerotic Cardiovascular Disease Pooled Cohort Risk Equations by Social Deprivation Status. *Journal of the American Heart Association*. 2017;6.
33. Howard V, Cushman M, Pulley L, Gomez C, Go R, Prineas R, Graham A, Moy C and Howard G. The reasons for geographic and racial differences in stroke study: objectives and design. *Neuroepidemiology*. 2005;25.
34. American Hospital Association Annual Survey dataset.
35. Stekhoven D and Bühlmann P. MissForest--non-parametric missing value imputation for mixed-type data. *Bioinformatics (Oxford, England)*. 2012;28.
36. Stekhoven D. MissForest: Nonparametric Missing Value Imputation using Random Forest. R package version 1.5. 2022.
37. Healthy People 2030. <https://health.gov/healthypeople/objectives-and-data/social-determinants-health>.
38. America's Health Rankings.

39. Unlu O, Levitan E, Reshetnyak E, Kneifati-Hayek J, Diaz I, Archambault A, Chen L, Hanlon J, Maurer M, Safford M, Lachs M and Goyal P. Polypharmacy in Older Adults Hospitalized for Heart Failure. *Circulation: Heart Failure*. 2020;13.
40. Andersen R and Davidson P. Improving access to care in America: Individual and contextual indicators. *Changing the US Health Care System: Key Issues in Health Services Policy and Management*. 2014;2007.
41. Heidenreich P, Bozkurt B, Aguilar D, Allen L, Byun J, Colvin M, Deswal A, Drazner M, Dunlay S, Evers L, Fang J, Fedson S, Fonarow G, Hayek S, Hernandez A, Khazanie P, Kittleson M, Lee C, Link M, Milano C, Nnacheta L, Sandhu A, Stevenson L, Vardeny O, Vest A and Yancy C. 2022 AHA/ACC/HFSA Guideline for the Management of Heart Failure: A Report of the American College of Cardiology/American Heart Association Joint Committee on Clinical Practice Guidelines. *Circulation*. 2022;145.
42. Peterson P, Rumsfeld J, Liang L, Albert N, Hernandez A, Peterson E, Fonarow G and Masoudi F. A validated risk score for in-hospital mortality in patients with heart failure from the American Heart Association get with the guidelines program. *Circulation: Cardiovascular Quality and Outcomes*. 2010;3.
43. Knol M, Le CS, Algra A, Vandenbroucke J and Groenwold R. Overestimation of risk ratios by odds ratios in trials and cohort studies: alternatives to logistic regression. *CMAJ : Canadian Medical Association journal = journal de l'Association medicale canadienne*. 2012;184.
44. Nayak A, Hicks A and Morris A. Understanding the Complexity of Heart Failure Risk and Treatment in Black Patients. *Circulation: Heart Failure*. 2020;13.

45. Bradley A, Adeleke I and Estime S. Healthcare disparities in trauma: why they exist and what we can do. *Current Opinion in Anaesthesiology*. 2022;35.
46. Khidir H, McWilliams J, O'Malley A, Zaborski L, Landon B and Smulowitz P. Analysis of Consistency in Emergency Department Physician Variation in Propensity for Admission Across Patient Sociodemographic Groups. *JAMA network open*. 2021;4.
47. Egede L, Walker R and Williams J. Intersection of Structural Racism, Social Determinants of Health, and Implicit Bias With Emergency Physician Admission Tendencies. *JAMA network open*. 2021;4.
48. Hawkins N, Jhund P, McMurray J and Capewell S. Heart failure and socioeconomic status: Accumulating evidence of inequality. *European Journal of Heart Failure*. 2012;14:138-46.
49. Potter E, Hopper I, Sen J, Salim A and Marwick T. Impact of socioeconomic status on incident heart failure and left ventricular dysfunction: systematic review and meta-analysis. *European Heart Journal: Quality of Care & Clinical Outcomes*. 2019;5:169-179.
50. Schrage B, Lund L, Benson L, Stolfo D, Ohlsson A, Westerling R, Westermann D, Strömberg A, Dahlström U, Braunschweig F, Ferreira J and Savarese G. Lower socioeconomic status predicts higher mortality and morbidity in patients with heart failure. *Heart*. 2021;107:229-236.
51. Squire I. Socioeconomic status and outcomes in heart failure with reduced ejection fraction. *Heart*. 2018;104:966-967.
52. Joynt Maddox K, Reidhead M, Hu J, Kind A, Zaslavsky A, Nagasako E and Nerenz D. Adjusting for social risk factors impacts performance and penalties in the hospital readmissions reduction program. *Health Services Research*. 2019;54.

53. Trapl E, Smith S, Joshi K, Osborne A, Benko M, Matos A and Bolen S. Dietary Impact of Produce Prescriptions for Patients With Hypertension. *Preventing Chronic Disease*. 2018;15.
54. Behforouz H, Drain P and Rhatigan J. Rethinking the social history. *The New England Journal of Medicine*. 2014;371.
55. Samra R and Hankivsky O. Adopting an intersectionality framework to address power and equity in medicine. *The Lancet*. 2021;397.
56. Javed Z, Haisum M, Yahya T, Amin Z, Acquah I, Valero-Elizondo J, Andrieni J, Dubey P, Jackson R, Daffin M, Cainzos-Achirica M, Hyder A and Nasir K. Race, Racism, and Cardiovascular Health: Applying a Social Determinants of Health Framework to Racial/Ethnic Disparities in Cardiovascular Disease. *Circulation: Cardiovascular Quality and Outcomes*. 2022;15.
57. Powell-Wiley T, Baumer Y, Baah F, Baez A, Farmer N, Mahlobo C, Pita M, Potharaju K, Tamura K and Wallen G. Social Determinants of Cardiovascular Disease. *Circulation Research*. 2022;130.

## Figure Legends

Figure 1: Healthy People 2030 Approach to Social Determinants of Health (SDOH)<sup>37</sup>

We studied nine SDOH, mapped onto the Healthy People 2030 conceptual framework (re-published from Sterling et al.,<sup>25</sup> with permission).

Figure 2: Prevalence of Individual SDOH

The prevalence of the nine SDOH were calculated among REasons for Geographic And Racial Difference in Stroke (REGARDS) patients. Low annual household income (< \$35,000/year) had the highest prevalence (56.2%) among SDOH.

Figure 3: Relative Risk Ratios (RR) for Association Between Income <\$35,000 and Cardiologist Involvement

Low income was inversely associated with cardiologist involvement in both age-adjusted analysis (RR: 0.88 [95% CI: 0.82-0.95]) and fully-adjusted models (RR: 0.89 [95% CI: 0.82-0.97]).



Figure 1: Healthy People 2030 Approach to Social Determinants of Health<sup>35</sup>

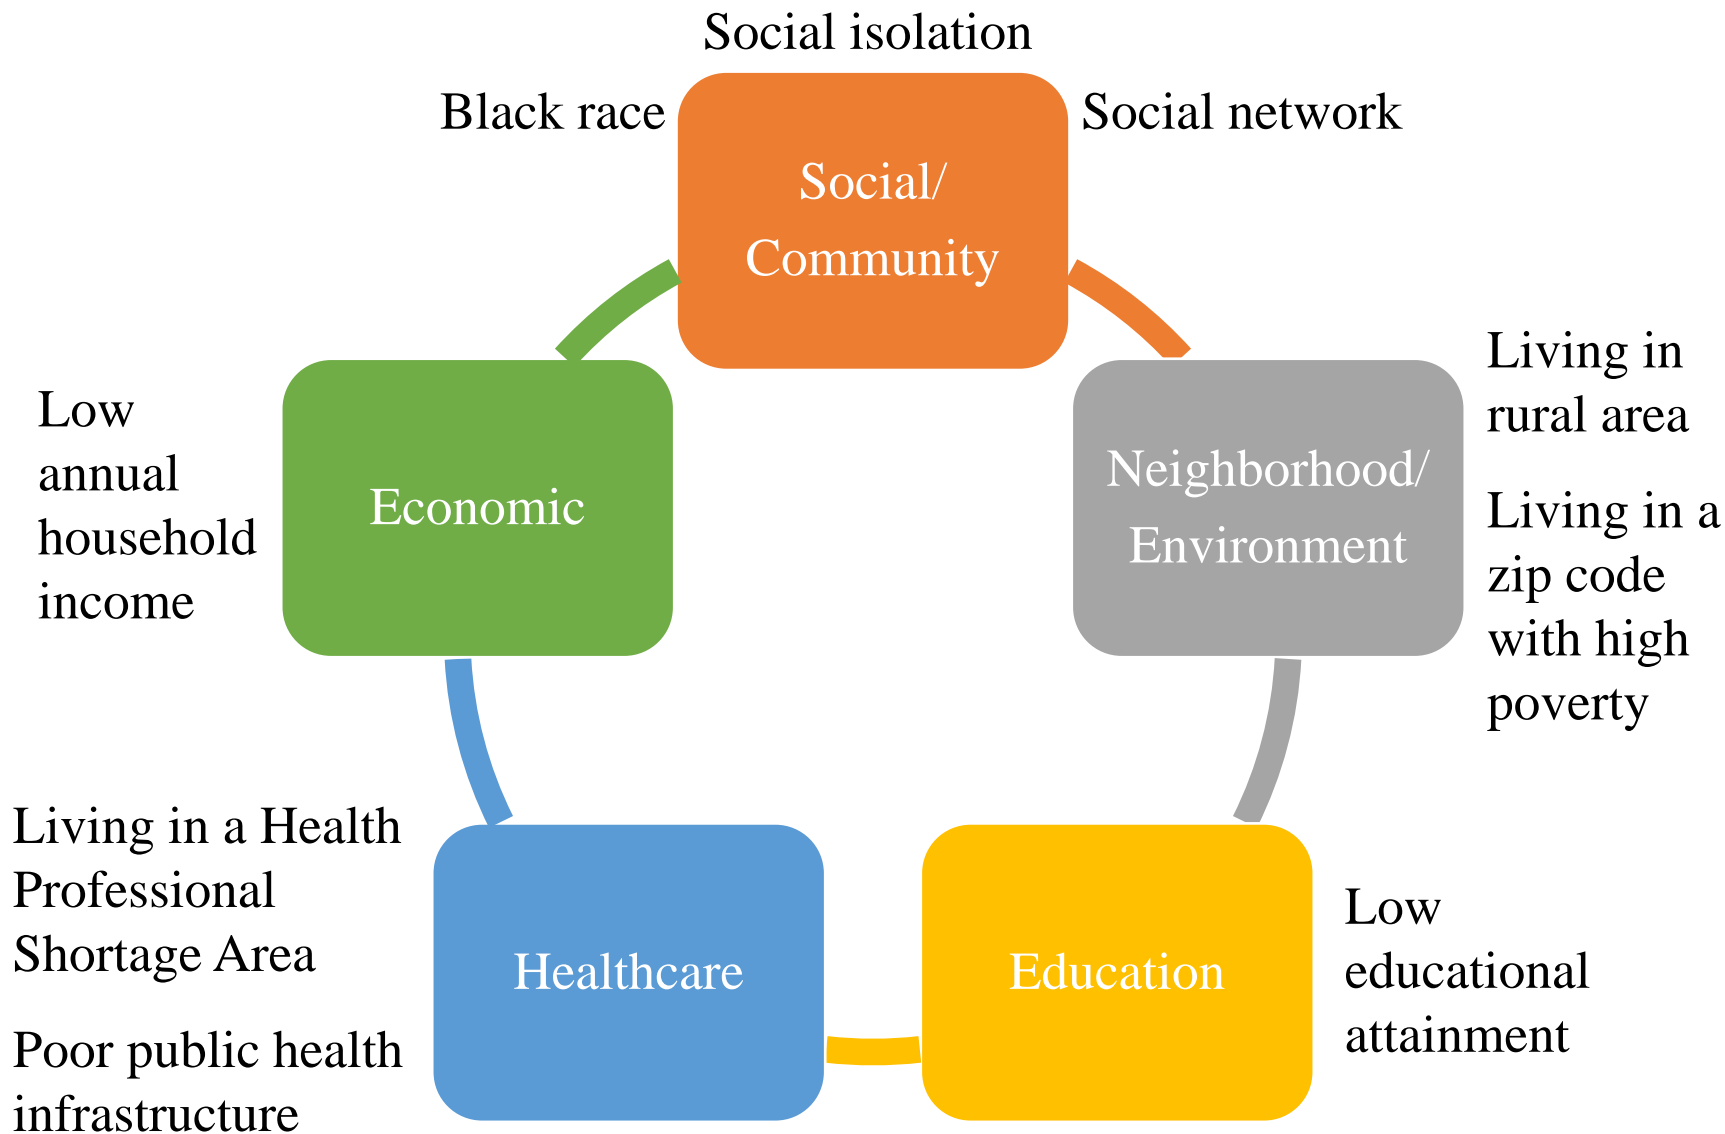

## Figure 2: Prevalence of Individual SDOH

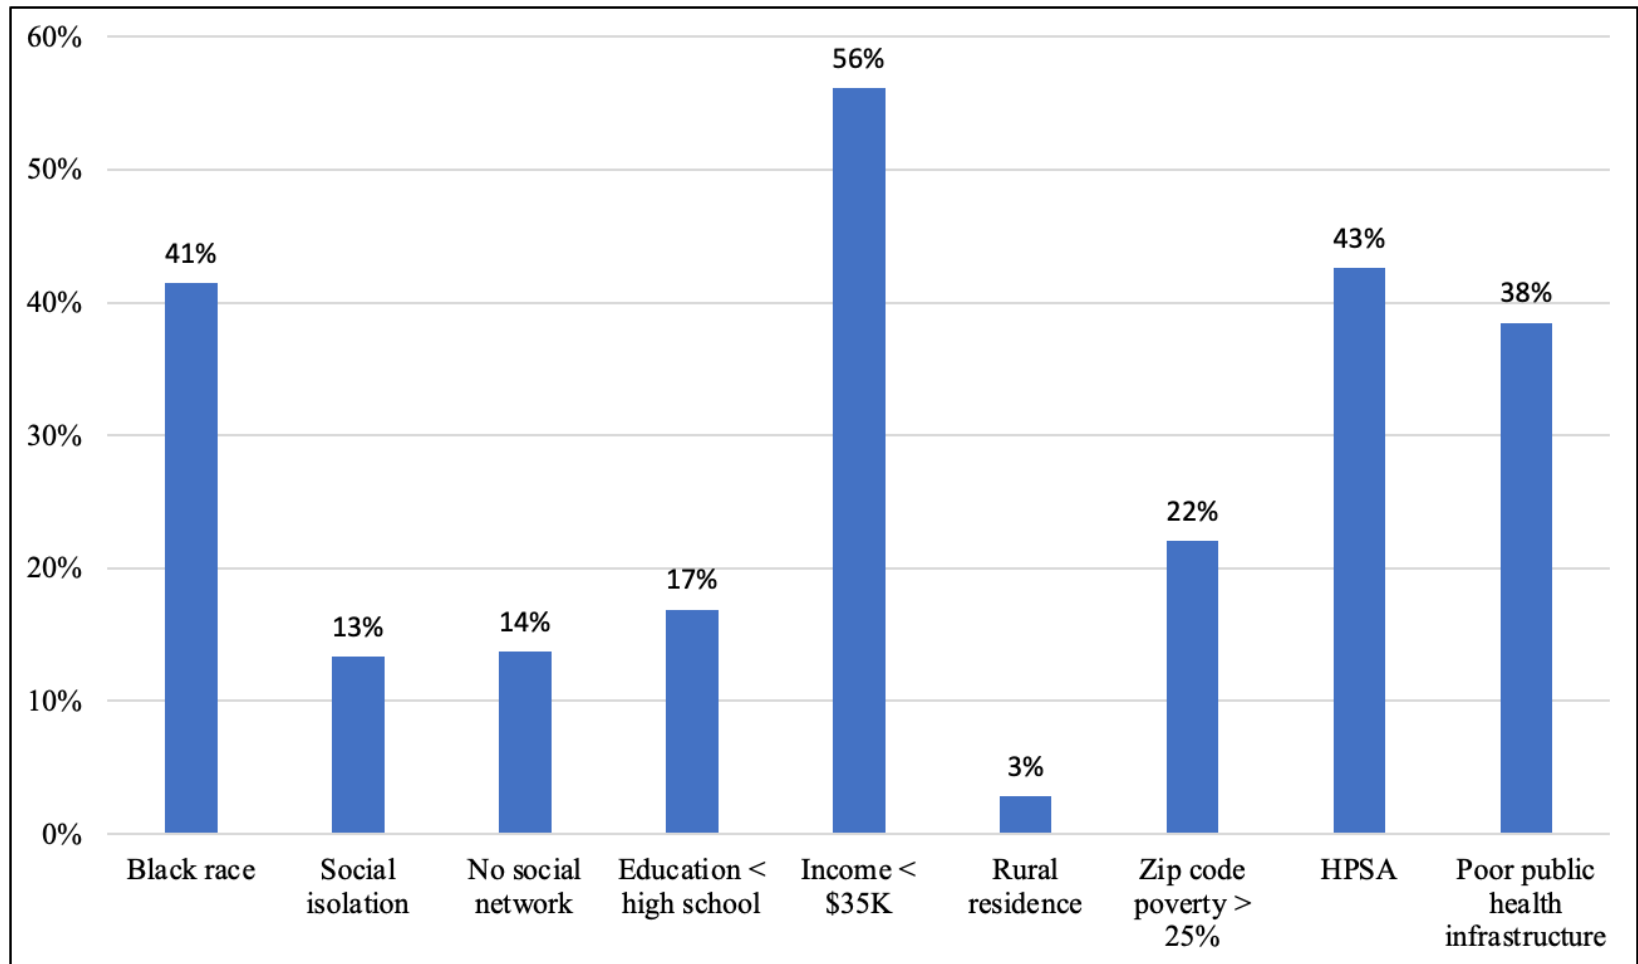

Figure 3: Relative Risk Ratios for Association Between Income <\$35,000 and Cardiologist Involvement

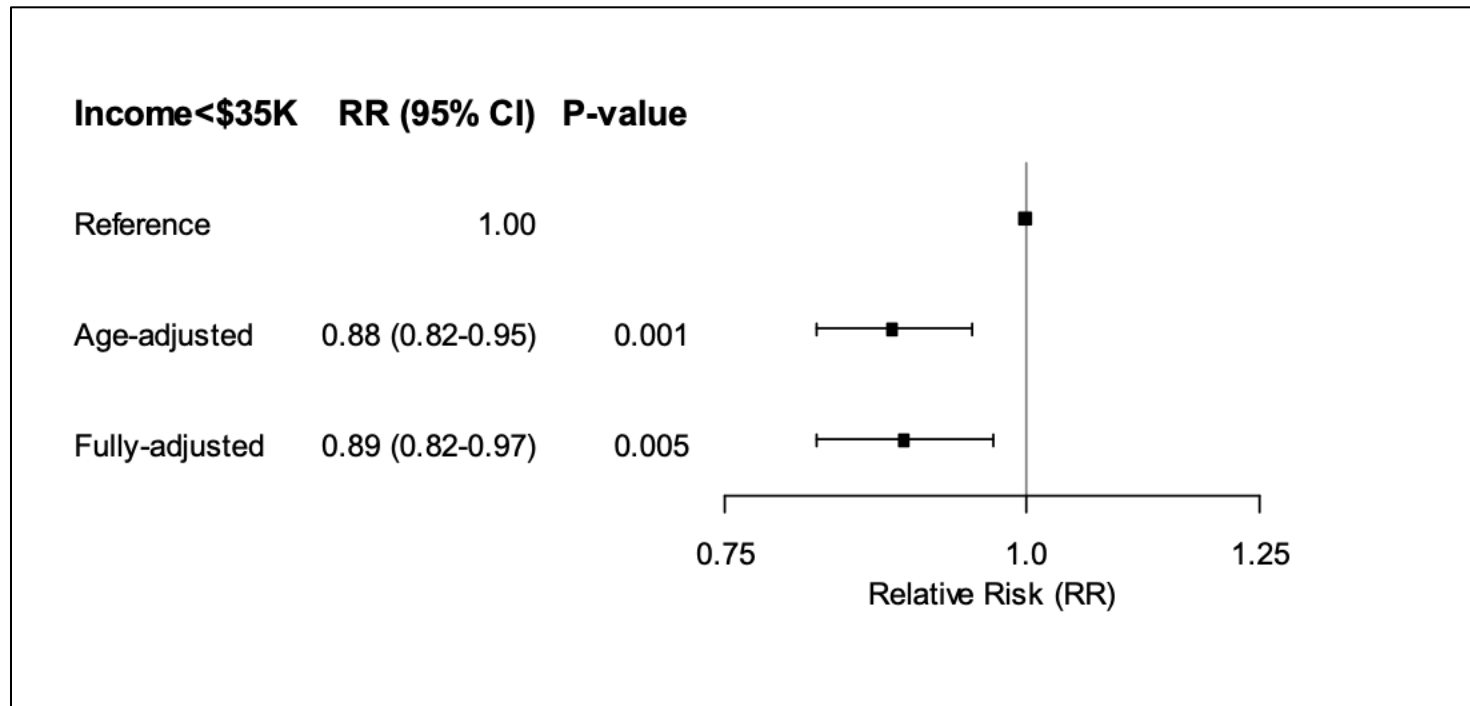

# Supplemental Figure 1: Inclusion/Exclusion Cascade

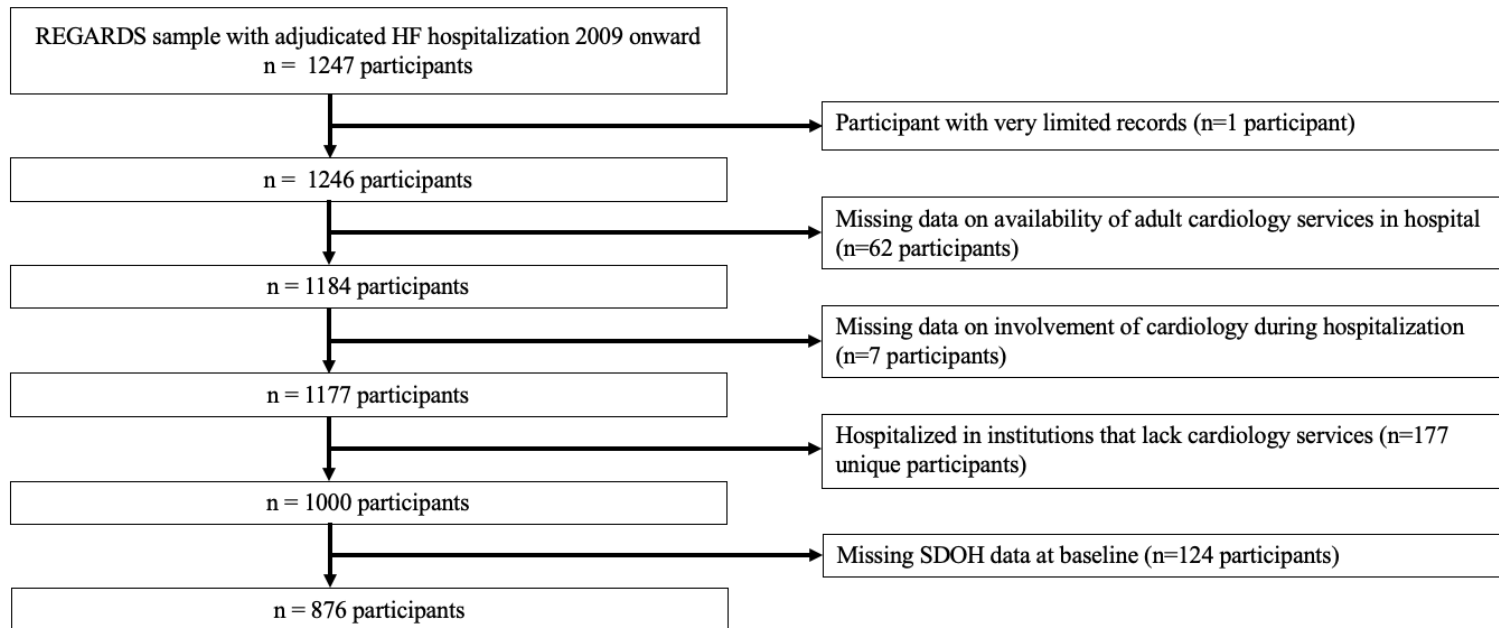

Table 1: Age-adjusted relative risks for the association of candidate SDOH with cardiologist involvement

| SDOH                                          | Relative Risk (95% Confidence Intervals) | p-value |
|-----------------------------------------------|------------------------------------------|---------|
| Black race                                    | 0.97 (0.90, 1.04)                        | 0.38    |
| Social isolation                              | 0.96 (0.86, 1.07)                        | 0.48    |
| Social network                                | 0.91 (0.80, 1.03)                        | 0.12    |
| Low educational attainment                    | 0.95 (0.86, 1.05)                        | 0.32    |
| Low annual household income                   | 0.88 (0.82, 0.95)                        | <0.001* |
| Living in rural areas                         | 0.98 (0.78, 1.23)                        | 0.85    |
| Living in a zip code with high poverty        | 0.96 (0.88, 1.05)                        | 0.43    |
| Living in a Health Professional Shortage Area | 1.03 (0.96, 1.11)                        | 0.43    |
| Poor public health infrastructure             | 1.03 (0.96, 1.11)                        | 0.39    |

\* retained for further analysis

SDOH = social determinants of health

Table 2: Participant characteristics stratified by annual household income

| Characteristic, n (%)               | n   | Total (n=876)           | Income<br>≥\$35,000<br>(n=384) | Income<br><\$35,000<br>(n=492) | p-value |
|-------------------------------------|-----|-------------------------|--------------------------------|--------------------------------|---------|
| Age in years, median<br>(IQR)       | 876 | 77.54 (70.95,<br>83.73) | 77.31 (71.46,<br>83.38)        | 77.89 (70.45,<br>84.04)        | 0.82    |
| Black race                          | 876 | 363 (41.4%)             | 108 (28.1%)                    | 255 (51.8%)                    | <0.001  |
| Female                              | 876 | 402 (45.9%)             | 115 (29.9%)                    | 287 (58.3%)                    | <0.001  |
| Region                              | 876 |                         |                                |                                | 0.05    |
| Non-belt                            |     | 359 (41.0%)             | 162 (42.2%)                    | 197 (40.0%)                    |         |
| Belt                                |     | 319 (36.4%)             | 124 (32.3%)                    | 195 (39.6%)                    |         |
| Buckle                              |     | 198 (22.6%)             | 98 (25.5%)                     | 100 (20.3%)                    |         |
| <i>HF characteristics</i>           |     |                         |                                |                                |         |
| New York Heart<br>Association Class | 669 |                         |                                |                                | 0.52    |
| I                                   |     | 49 (7.3%)               | 24 (8.1%)                      | 25 (6.7%)                      |         |
| II                                  |     | 205 (30.6%)             | 84 (28.2%)                     | 121 (32.6%)                    |         |
| III                                 |     | 270 (40.4%)             | 120 (40.3%)                    | 150 (40.4%)                    |         |
| IV                                  |     | 145 (21.7%)             | 70 (23.5%)                     | 75 (20.2%)                     |         |
| HFpEF                               | 664 | 292 (44.0%)             | 114 (38.8%)                    | 178 (48.1%)                    | 0.016   |
| GWTG-HF Risk Score,<br>median (IQR) | 859 | 2 (2,2)                 | 2 (2,2)                        | 2 (1,2)                        | 0.029   |
| Length of stay in days,             | 873 | 5 (3, 8)                | 4 (3, 8)                       | 5 (3, 8)                       | 0.96    |

|                                                   |     |                |                |                |        |
|---------------------------------------------------|-----|----------------|----------------|----------------|--------|
| median (IQR)                                      |     |                |                |                |        |
| ICU stay                                          | 872 | 191 (21.9%)    | 81 (21.2%)     | 110 (22.4%)    | 0.66   |
| In-hospital cardiac arrest                        | 873 | 35 (4.0%)      | 12 (3.1%)      | 23 (4.7%)      | 0.25   |
| <i>Comorbid conditions</i>                        |     |                |                |                |        |
| Coronary artery disease                           | 876 | 671 (76.6%)    | 295 (76.8%)    | 376 (76.4%)    | 0.89   |
| Arrhythmia                                        | 876 | 388 (44.3%)    | 194 (50.5%)    | 194 (39.4%)    | <0.001 |
| Number of non-cardiac comorbidities, median (IQR) | 876 | 5 (3, 7)       | 5 (4, 7)       | 5 (3, 7)       | 0.29   |
| Diabetes                                          | 876 | 438 (50.0%)    | 166 (43.2%)    | 272 (55.3%)    | <0.001 |
| Stroke                                            | 876 | 219 (25.0%)    | 89 (23.2%)     | 130 (26.4%)    | 0.27   |
| <i>Hospital characteristics</i>                   |     |                |                |                |        |
| Total number of hospital beds, median (IQR)       | 854 | 374 (235, 596) | 384 (237, 603) | 362 (234, 592) | 0.43   |
| Presence of cardiac ICU                           | 818 | 551 (67.4%)    | 246 (68.9%)    | 305 (66.2%)    | 0.41   |
| Academic hospital                                 | 826 | 504 (61.0%)    | 222 (62.4%)    | 282 (60.0%)    | 0.49   |

IQR = interquartile range

HF = heart failure

HFpEF = heart failure with preserved ejection fraction

GWTG-HF = Get With The Guidelines®-Heart Failure

ICU = intensive care unit
